# Supplementary material for: Alexithymia in Neurological Disease: A Review
Source: Atypon-hosted journal article supplement (doi:10.1176/appi.neuropsych.14070169), 2015-02-06
Supplement: appi.neuropsych.14070169.ds001.pdf [file appi.neuropsych.14070169.ds001.pdf]

 


Psychiatry Online
